# Supplementary material for: Extreme winds over Europe in the ENSEMBLES regional climate models
Source: Copernicus journal article supplement (doi:10.5194/acp-13-5163-2013), 2013-05-22
Supplement: Supplementary file 1 [file acp-13-5163-2013-supplement.pdf]

## 1 Supplemental Figures

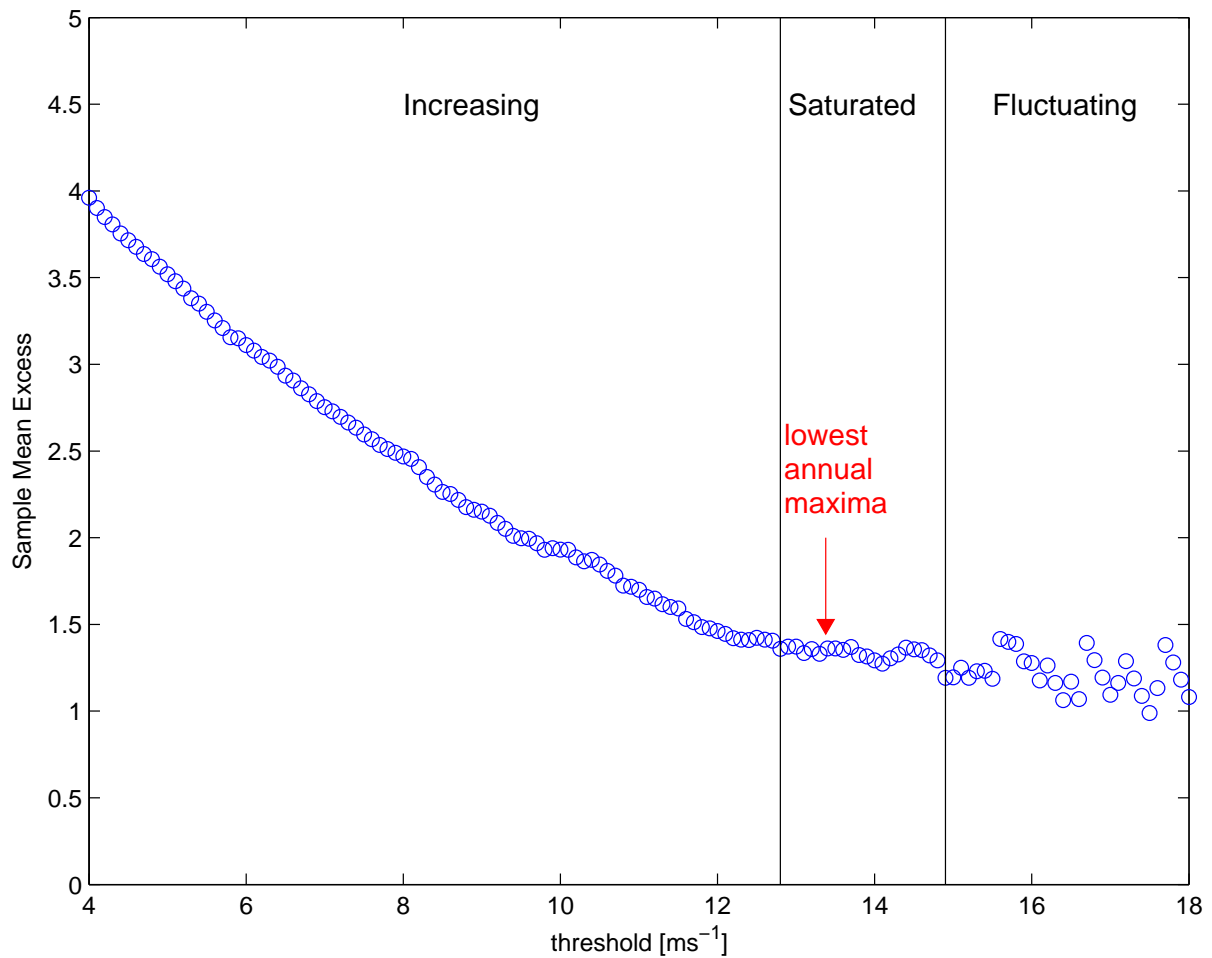

2

3 Supplementary Figure S1: Sample Mean Excess (SME) for a range of thresholds at the grid point closest to  
4 Bergen, Norway in the BCM-HIRHAM5 downscaling. The SME is increasing below approximately 12.8 ms<sup>-1</sup> and  
5 fluctuating above approximately 14.9 ms<sup>-1</sup>. Using a visual inspection, the threshold would be set at around 13  
6 ms<sup>-1</sup>. The threshold used in our approach is the minimum annual maximum, at 13.4 ms<sup>-1</sup>.

7

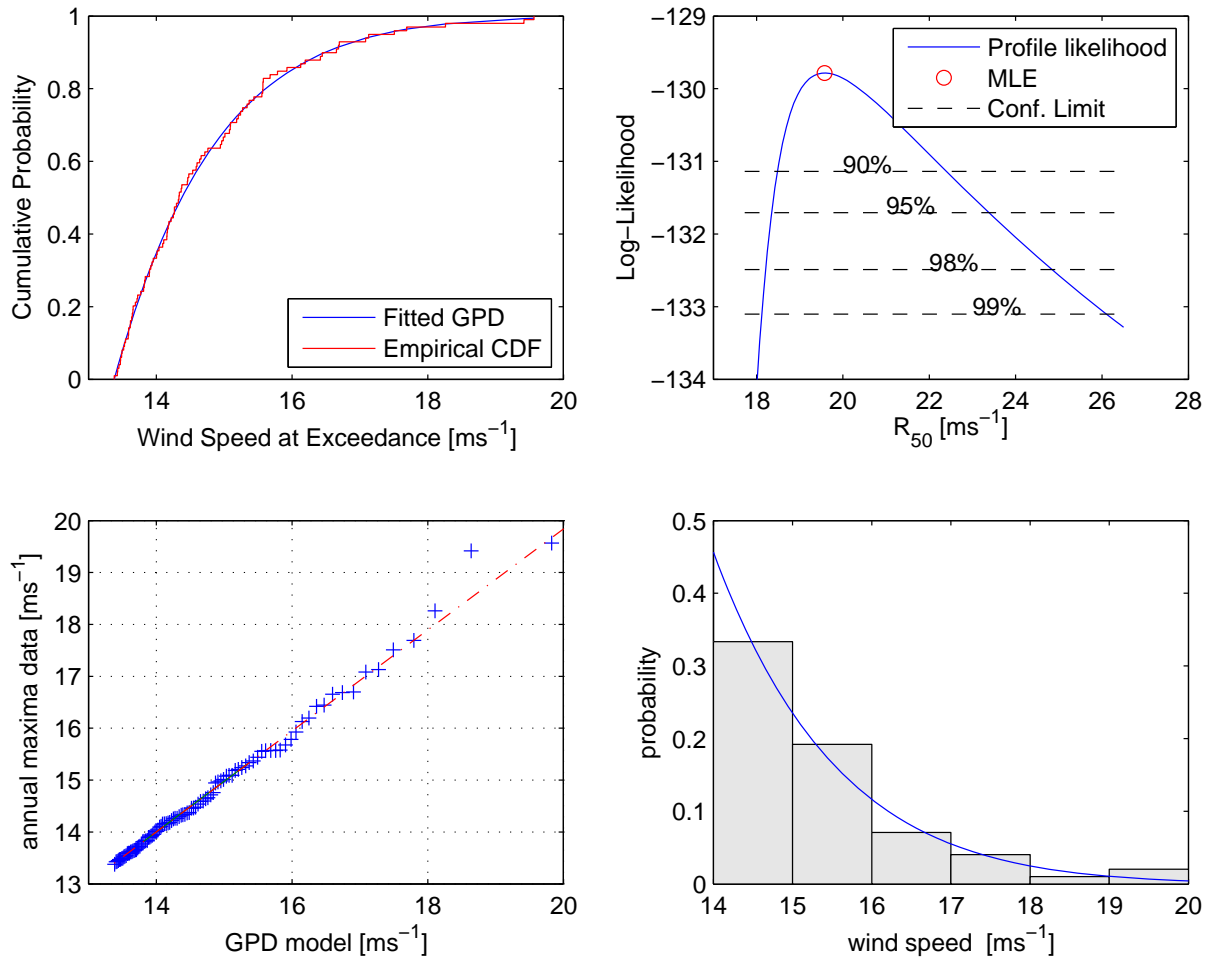

8

9 Supplementary Figure S2: Model quality tests for the grid point closest to Bergen, Norway in the BCM-  
 10 HIRHAM5 downscaling. The empirical data in red is compared to the fitted CDF in blue (top left); the GPD QQ-  
 11 plot is shown with the 1-1 line in red (bottom left); the fitted PDF is compared to a histogram of the data  
 12 (bottom right); and the profile likelihood is shown in blue (top right) along with the various confidence interval  
 13 levels dashed in black. The red circle indicates the maximum likelihood estimation.

14

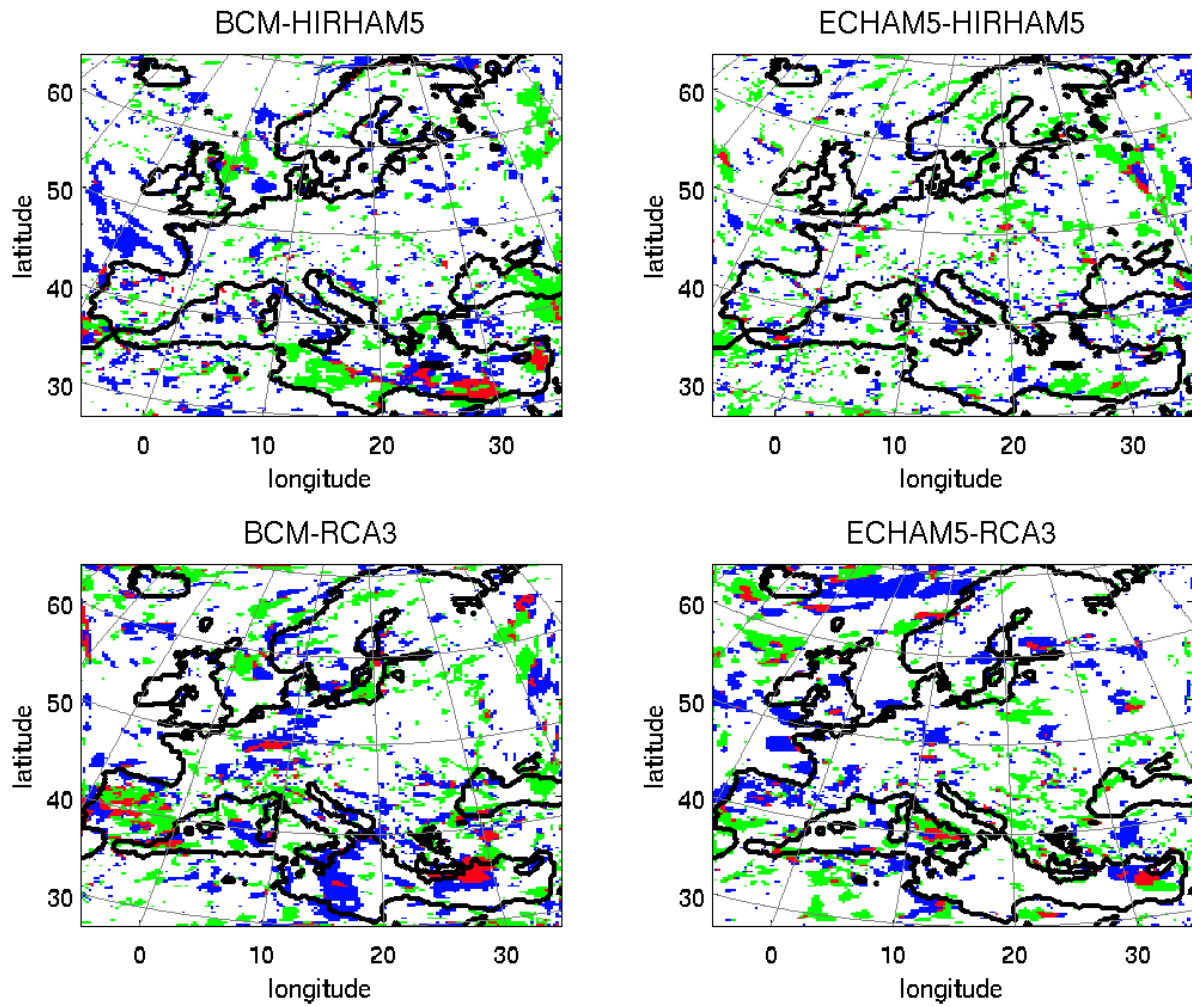

15

16 Supplementary Figure S3: Likelihood Ratio Tests in the four model downscalings. White: Likelihood ratio test  
 17 passed. Green: Likelihood ratio test failed in reference period. Blue: Likelihood ratio test failed in future period.  
 18 Red: Likelihood ratio test failed in both periods.

19

20
